# Supplementary material for: Characterization of the Esi3/RCI2/PMP3 gene family in the Triticeae
Source: PubMed Central journal article supplement (PMC6288971; doi:10.1186/s12864-018-5311-8), 2018-12-11
Supplement: 12864_2018_5311_MOESM8_ESM.pdf [file 12864_2018_5311_MOESM8_ESM.pdf]

**A**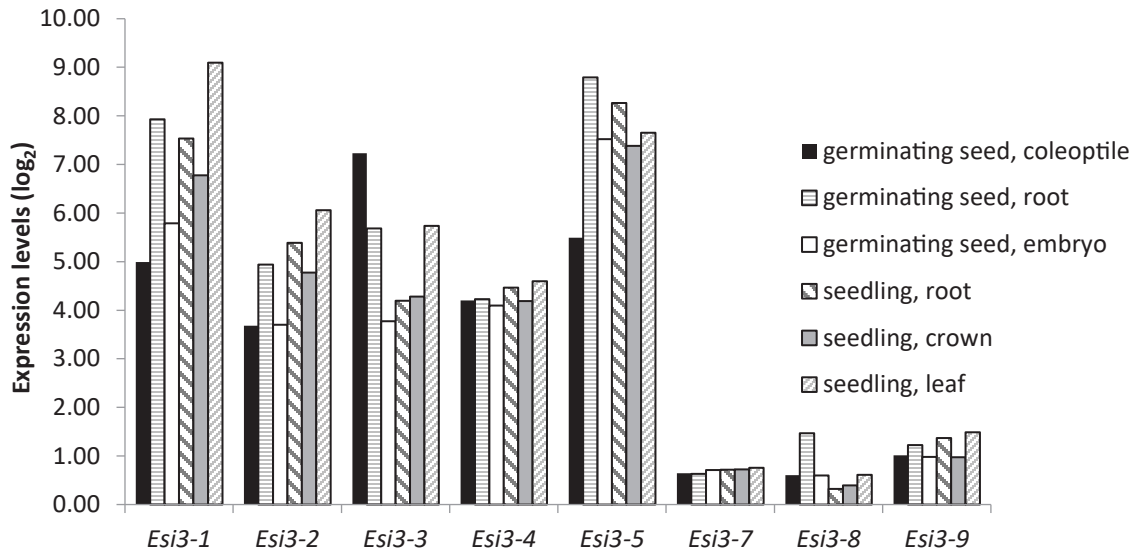**B**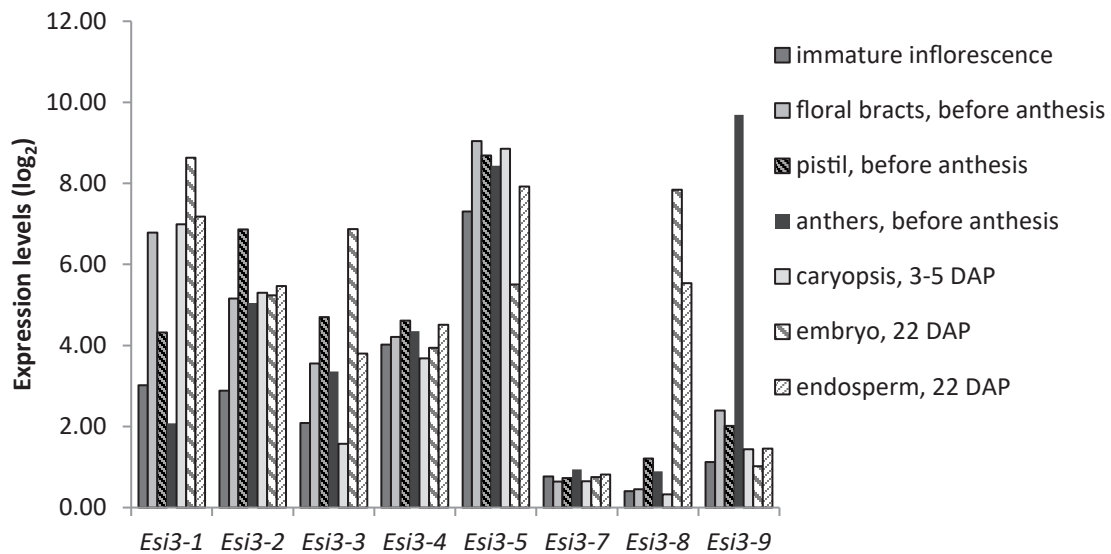

**Additional Figure 1:** Tissue specific expression of the *Esi3* genes across thirteen *T. aestivum* tissue types assayed by microarray. **(A)** Young tissue types ranging from germinating seed to seedling stages. **(B)** Mature tissue types before anthesis, 3-5 and 22 days after pollination (DAP). Values are RMA normalized and are in log<sub>2</sub> units. All microarray values had 4 subtracted, this was treated as background.
