# Supplementary material for: Characterization of the Esi3/RCI2/PMP3 gene family in the Triticeae
Source: BMC Genomics. 2018 Dec 11;19:898. doi: 10.1186/s12864-018-5311-8 (PMC6288971; doi:10.1186/s12864-018-5311-8)
Supplement: Supplementary file 6 — Table S4. Esi3/RCI2/PMP3 gene expression levels in five tissue types of T. aestivum. (XLSX 18 kb) [file 12864_2018_5311_MOESM6_ESM.xlsx]

## Sheet: Sheet1
Table S4 A:	Esi3/RCI2/PMP3 gene expression in tissues of T. aestivum (RPKPM)						Table S4 B:	Esi3/RCI2/PMP3 fold difference in gene expression in tissues of T. aestivum compared to the leaf
	Leafa	Seedb	Rootc	Stemd	Inflorescencee			Leafa	Seedb	Rootc	Stemd	Inflorescencee
Esi3-1-A	5.02494	0.898676	32.5436	35.6572	6.21074		Esi3-1-A	1	0.178843	6.47641	7.09603	1.23598
Esi3-1-B	0.779737	0.048528	16.6508	27.4678	3.41852		Esi3-1-B	1	0.0622363	21.3544	35.227	4.38419
Esi3-1-D	0.790728	0	24.5402	13.1117	0.238422		Esi3-1-D	1	0	31.0349	16.5819	0.301522
Esi3-2-A	0.794911	0	5.18564	3.83811	6.60661		Esi3-2-A	1	0	6.52354	4.82835	8.31113
Esi3-2-D	0.108386	0	1.90123	1.32731	0.445272		Esi3-2-D	1	0	17.5414	12.2461	4.10822
Esi3-3-A	1.04665	0.153411	0.382094	0.569341	0.0951039		Esi3-3-A	1	0.146574	0.365065	0.543965	0.0908651
Esi3-3-B	15.6811	8.30594	4.34659	15.883	0.984664		Esi3-3-B	1	0.529678	0.277187	1.01288	0.0627931
Esi3-3-D	5.28322	5.44121	3.08197	14.5636	2.76928		Esi3-3-D	1	1.0299	0.583351	2.75657	0.524165
Esi3-4-A	3.91796	4.86557	37.434	23.855	8.48418		Esi3-4-A	1	1.24186	9.55447	6.08865	2.16546
Esi3-4-B	17.7019	38.8949	102.394	40.7793	21.1962		Esi3-4-B	1	2.19721	5.78431	2.30366	1.1974
Esi3-4-D	34.8245	31.1149	78.7831	60.8478	36.661		Esi3-4-D	1	0.893476	2.26229	1.74727	1.05273
Esi3-5-A	112.034	11.5877	43.529	51.8503	28.4915		Esi3-5-A	1	0.103431	0.388534	0.462809	0.254311
Esi3-5-B	87.9342	2.35097	151.878	89.5084	34.1395		Esi3-5-B	1	0.0267355	1.72717	1.0179	0.388239
Esi3-5-D	104.503	4.46415	65.0294	43.4986	50.0692		Esi3-5-D	1	0.0427181	0.622276	0.416244	0.47912
Esi3-6-A	0.0461382	0	0	0	0.0342994		Esi3-6-A	1	0	0	0	0.743406
Esi3-6-B	0.297783	0	0.154293	0	0.0690154		Esi3-6-B	1	0	0.518138	0	0.231764
Esi3-6-D	0.297783	0	0.154293	0	0.0690154		Esi3-6-D	1	0	0.518138	0	0.231764
Esi3-7-A	3.37965	0.0808015	1.60999	1.53957	1.62405		Esi3-7-A	1	0.0239082	0.476377	0.45554	0.480538
Esi3-7-B	1.7642	0.61776	0.951535	1.93798	1.03055		Esi3-7-B	1	0.350164	0.539358	1.0985	0.584147
Esi3-7-D	3.56492	0.302719	1.84185	4.56355	0.935346		Esi3-7-D	1	0.0849161	0.516659	1.28013	0.262375
Esi3-8-A	0	1.20777	0	0	0		Esi3-8-A	1	N/A	N/A	N/A	N/A
Esi3-8-B	0.230852	6.7013	0.0582855	0.520795	0.0913314		Esi3-8-B	1	29.0286	0.25248	2.25597	0.395628
Esi3-8-D	0	40.801	0	0	0.0341393		Esi3-8-D	1	N/A	N/A	N/A	N/A
Esi3-9-A	0	0	0	0	0		Esi3-9-A	N/A	N/A	N/A	N/A	N/A
Esi3-9-B	0	0	0	0	0		Esi3-9-B	N/A	N/A	N/A	N/A	N/A
Esi3-9-D	0	0	0	0	0		Esi3-9-D	N/A	N/A	N/A	N/A	N/A
Esi3-10-A	0	0	0	0	0		Esi3-10-A	1	N/A	N/A	N/A	N/A
Esi3-10-B	24.4569	7.03424	21.3414	27.3917	21.7062		Esi3-10-B	1	0.287618	0.872614	1.12	0.887527
Esi3-10-D	66.6054	2.73928	89.0486	84.7317	59.7161		Esi3-10-D	1	0.041127	1.33696	1.27215	0.896566
Note: Data from Pingault et al., 2015 [27].							Note: Data from Pingault et al., 2015 [27].
a whole plant fruit formation stage 30 to 50%							a whole plant fruit formation stage 30 to 50%
b whole plant at the ripening stage							b whole plant at the ripening stage
c cotyledon emergence stage							c cotyledon emergence stage
d two nodes or internodes visible stage							d two nodes or internodes visible stage
e maximum stem length reached stage							e maximum stem length reached stage
